# Supplementary material for: Hygroscopicity of Isoprene-Derived Secondary Organic Aerosol Mixture Proxies: The Importance of Solute Diffusion and Salting-In Effects
Source: Copernicus journal article supplement (doi:10.5194/egusphere-2025-1935), 2025-06-10
Supplement: Supplementary file [file egusphere-2025-1935-AC1-supplement.pdf]

Reviewer 1

We thank the reviewer for their positive comments and questions. We have addressed each comment on a point by point basis in blue text.

In this study, the authors demonstrate that viscosity could influence the diffusion within aqueous droplets, resulting in complex phase morphology and water uptake properties for the 2-MT, 2-MTS and their mixtures with AS under saturated and supersaturated conditions. This is a comprehensive laboratory work and provides new valuable data to better understand the water uptake of isoprene derived SOA. The paper is well written. The data are well presented and discussed. I have some questions related to the measurements and a few minor comments.

#### Comments on measurements

Line 150, “Droplet surface tension ( $\sigma_s/a$ ) was measured using a pendant drop tensiometer with a modified profile analysis tensiometer (SINTERFACE Inc.); the experimental set up has been previously described in Fertil et al. (2025). Briefly described here, the pendant drop tensiometer generates a droplet of solution ( $< 10 \mu\text{L}$ ) suspended from a 0.9-mm diameter needle (Beier et al., 2019; Fertil et al., 2025). Droplets remain suspended for 300 s to reach equilibrium”. What was the ambient relative humidity that the droplets exposed to in these measurements? When the droplets were at equilibrium with their surrounding, do the equilibrium composition of the droplets same as initial their stock solutions?

- Measurements were obtained at ambient room conditions; the temperature through the day ranged from 20.2-22°C and RH ranged from 40-45% RH. Across all replicates presented, an average droplet volume change of 1.7% was observed between the start and end of measurement. This clarification has been added to the text:

*“Surface tension measurements were run in triplicate; prior to each measurement, the tensiometer was flushed with DI water and ~ 2 mL of solution. Measurements were obtained at ambient room conditions, with temperature range of 20.2-22 °C and relative humidity range of 40-45 % RH.”*

- Due to the short timeframes of suspension and this negligible change in droplet volume, it is not expected that evaporation effects will result in any meaningful change in droplet concentration between when the droplet is at equilibrium compared to its initial stock solution. The text has been modified to clarify this:

*“Here, evaporation effects are negligible during the short suspension times. Therefore, the organic molar concentration  $C$  is equivalent to the droplet solution concentration as Eq. 2 can then be rearranged to solve for  $D_s$  using dynamic surface tension measurements. .”*

Line 455, “Consequently, current hygroscopicity measurements that occur at fast time scales may not capture the full water uptake process of the synthesized organics and their mixtures”. Can the authors comment if equilibrium hygroscopic measurements were achieved in all their investigated systems?

- We are unable to determine this as the residence time is so short for CCNC (10 seconds) and H-TDMA measurements (6.5 seconds) but we hope the findings of this paper leads to more investigation regarding hygroscopic measurements of 2-MT/2-MTS at equilibrium and how to improve upon water uptake instrumentations. We acknowledge that this in our manuscript:

*“Consequently, current hygroscopicity measurements that occur at fast time scales may not capture the full water uptake process of the synthesized organics and their mixtures. For example, the residence of aerosols within DMT CCNC columns is ~ 10 s (Paramonov et al., 2015) while similar H-TDMA instrument set ups have a residence time ~ 6.5 s (Mikhailov & Vlasenko, 2020). However, a previous study by Chuang et al. (2003) found atmospheric droplet growth timescales range between 5 to 100 s, congruent with the timescale of 2-MT and 2-MTS dynamic surface tension change (Fig. 2. and Chuang, 2003).”*

#### Other comments

For the water uptake measurements, would there be any volatility issue of 2-MT aerosols?

- In our CCNC experiments, we do not use large enough  $\Delta T$ 's for 2-MT to volatilize during our runs. Additionally, if this process was occurring during both H-TDMA and CCNC experiments, we would see a significant change in  $\kappa$  over the duration of the runs; this would be most apparent during the increase of SS from 0.4 to 1%. However, we do not observe this and our  $\kappa$  values remain close to one another over multiple runs and supersaturations. In SI Table S24, the supersaturated  $\kappa$  values remained between 0.1-0.2, which is a close range for  $\kappa$  and constitute them as moderately hygroscopic according to Petters & Kreidenweis 2007.

#### References:

Petters, M. D., & Kreidenweis, S. M. (2007). A single parameter representation of hygroscopic growth and cloud condensation nucleus activity. *Atmos. Chem. Phys.*, 7(8), 1961-1971.  
<https://doi.org/10.5194/acp-7-1961-2007>

Line 290, “However, in comparison to previously studied organics, 2-MT and 2-MTS  $\sigma_s/a$  remains close to pure water in the dilute bulk regime (Fig. 1). Thus, 2-MT and 2-MTS

surface activity is negligible for droplet activation.” Can the authors also comment if droplet size would affect the results?

- Droplet size would not have a significant effect on these results as aerosol surface tension is dependent on surface area to volume ratio as opposed to droplet size alone (Bain et al., 2023). In theory, a higher concentrated organic solution (within a smaller droplet size) would result in greater surface tension depression. However, according to Bain et al., 2023 and Werner et al., 2025 aerosol surface tension would be much higher due to surface area-to-volume ratio dictating organic partitioning. As a result, aerosol droplets near activation would have surface tension values represented in the dilute bulk concentrations, as shown in Figure 1. As both 2-MT and 2-MTS surface tension remains close to water in this regime, aerosol surface tension would remain within water irrespective of droplet size.
- Additional text has been added in the manuscript to clarify this:

*“Previous studies by Bain et al. (2023) and Werner et al. (2025) emphasize the role of surface area-to-volume ratio dictating aerosol surface tension. Specifically, aerosol surface tension values are best represented by surface tension measurements of the organic in bulk solutions < 100 mM (Bain et al., 2023; Ferdousi-Rokib et al., 2025; Werner et al., 2025). Thus, 2-MT and 2-MTS surface activity is negligible for droplet activation as both dilute organic  $\sigma_{s/a}$  is close to that of pure water ( $\sim 72 \text{ mN m}^{-1}$ ).”*

#### References:

Bain, A., Ghosh, K., Prisle, N. L., & Bzdek, B. R. (2023). Surface-Area-to-Volume Ratio Determines Surface Tensions in Microscopic, Surfactant-Containing Droplets. *ACS Central Science*, 9(11), 2076-2083. <https://doi.org/10.1021/acscentsci.3c00998>

Werner, E. K., Hammond, M., & Bain, A. (2025). Surface tension predictions during hygroscopic growth and cloud droplet activation using a simple kinetic surfactant partitioning model. *Aerosol Science and Technology*, 59(7), 781–793. <https://doi.org/10.1080/02786826.2025.2465705>

Line 320, “This effect is more prominent in 2-MT than 2-MTS, as evident in its slower diffusion rates for concentrations >30 mM (Table S17).” Since the synthesized 2-MTS sample contain other species, will these species affect the diffusion rates?

- The other species may have an effect on the diffusion rates, as diffusion rates have been shown to be affected by composition in binary and higher order mixtures (Vignes 1966, Carrion et al., 2016). In our study, we observe how mixtures with AS can influence the diffusion rates. However, the influence of sodium methyl sulfate

(SMS) on diffusion rates is not as clear. Future research should focus on how SMS presence in mixtures can also influence diffusion rates via the methods presented in this study (e.g., dynamic surface tension measurements of 2-MTS sample/SMS mixtures).

- Additional clarification was added in the text:

*Both 2-MT and 2-MTS present complex viscous properties that may affect droplet phase and potentially change in the presence of inorganic compounds, such as AS. It is important to note that for 2-MTS, the remaining sample mass also contains SMS, which may further influence the estimated diffusion rates (Vignes, 1966; Guevara-Carrion et al., 2016). Future work should expand upon the methodology of this study to further understand the influence of SMS on viscous organic diffusivity, such as 2-MTS diffusion rates. Ultimately, diffusion effects were observed through dynamic surface tension measurements and may influence 2-MT, 2-MTS, and AS-mixed aerosol water uptake properties. Therefore, diffusion effects on synthesized organic and organic/AS aerosol mixtures were probed through water uptake measurements.*

#### References:

Vignes, A. (1966). Diffusion in Binary Solutions. Variation of Diffusion Coefficient with Composition. *Industrial & Engineering Chemistry Fundamentals*, 5(2), 189–199. <https://doi.org/10.1021/i160018a007>

Guevara-Carrion, G., Gaponenko, Y., Janzen, T., Vrabec, J., & Shevtsova, V. (2016). Diffusion in Multicomponent Liquids: From Microscopic to Macroscopic Scales. *The Journal of Physical Chemistry B*, 120(47), 12193–12210. <https://doi.org/10.1021/acs.jpcb.6b09810>

Line 345, “The organic 2-MT molecules do not diffuse fast enough to fully accumulate at the surface and substantially lower surface tension.” As mentioned above, do the data collect at their equilibrium states?

- As mentioned in the previous response, volumes are held steady with an average ~1.7% volume change over the measurements. Thus, when the data is collected, the observed plateau we obtain in our surface tension measurements can be attributed to an equilibrium state as opposed to other effects such as evaporation.

Line 405, “Thus, it is believed that both 2-MT and 2-MTS organics slowly dissolve, and phase separate to form a relatively viscous phase under subsaturated conditions, corresponding to slow diffusion coefficients” When phase separation occurs, what is the morphology or thickness of the organic coating?

- The morphology is present as core-shell, observed in the AFM images for both 2-MT/AS and 2-MTS/AS aerosol and similar to other viscous organic aerosol studies (e.g., but not limited to Zhang et al., 2018, Song et al., 2019, Gerrebos et al., 2024); the organic remains phase separated even as it is being slowly dissolved due to viscosity difference from the aqueous inorganic-containing phase. This has been further specified in the text:

*“A previous study by Cooke et al. (2022) observed a similar core-shell morphology for AS-seeded IEPOX-derived SOA particles; the study observed an organic shell, while the inorganic salt was observed to be present in the shell as well as within an aqueous core (Cooke et al., 2022). With AS dispersed on the outer shell as well as being present in an aqueous core, the inorganic salt in the shell will likely easily dissolve during water uptake and drive hygroscopicity, consistent with the results as observed in subsaturated hygroscopicity measurements.”*

*“For 2-MT, the organic diffusion is limited under both sub- and supersaturated conditions, likely due to the undissolved viscous organic phase (Fig. 4A). Specifically, 2-MT viscosity causes slower dissolution compared to AS and results in the phase separated morphology.”*

- As for thickness, it is difficult to quantify due to the flattening effects after particle impaction. Previous studies have modeled or estimated varied organic shell thickness. Examples include Schmedding et al., 2019 ranging thickness from 20 - 40 nm in their regional model and Riva et al., 2019 estimating an organic coating thickness of 40 nm for organosulfate/sulfate mixtures. We hope that future work will be able to utilize the synthesized 2-MT and 2-MTS samples to better estimate their organic shell thickness in organic-inorganic aerosol mixtures, as well as its implications for climate models.

#### References:

Zhang, Y., Chen, Y., Lambe, A. T., Olson, N. E., Lei, Z., Craig, R. L., Zhang, Z., Gold, A., Onasch, T. B., Jayne, J. T., Worsnop, D. R., Gaston, C. J., Thornton, J. A., Vizuete, W., Ault, A. P., & Surratt, J. D. (2018). Effect of the Aerosol-Phase State on Secondary Organic Aerosol Formation from the Reactive Uptake of Isoprene-Derived Epoxydiols (IEPOX). *Environmental Science & Technology Letters*, 5(3), 167-174. <https://doi.org/10.1021/acs.estlett.8b00044>

Schmedding, R., Rasool, Q. Z., Zhang, Y., Pye, H. O. T., Zhang, H., Chen, Y., Surratt, J. D., Lee, B. H., Mohr, C., Lopez-Hilfiker, F. D., Thornton, J. A., Goldstein, A. H., and Vizuete, W.: Predicting Secondary Organic Aerosol Phase State and Viscosity and its Effect on Multiphase Chemistry in a Regional Scale Air Quality Model, *Atmos. Chem. Phys. Discuss.*, <https://doi.org/10.5194/acp-2019-900>, 2019.

Riva, M., Chen, Y., Zhang, Y., Lei, Z., Olson, N. E., Boyer, H. C., Narayan, S., Yee, L. D., Green, H. S., Cui, T., Zhang, Z., Baumann, K., Fort, M., Edgerton, E., Budisulistiorini, S. H., Rose, C. A.,

Ribeiro, I. O., e Oliveira, R. L., dos Santos, E. O., Machado, C. M. D., Szopa, S., Zhao, Y., Alves, E. G., de Sá, S. S., Hu, W., Knipping, E. M., Shaw, S. L., Duvoisin Junior, S., de Souza, R. A. F., Palm, B. B., Jimenez, J.-L., Glasius, M., Goldstein, A. H., Pye, H. O. T., Gold, A., Turpin, B. J., Vizuete, W., Martin, S. T., Thornton, J. A., Dutcher, C. S., Ault, A. P., and Surratt, J. D.: Increasing Isoprene Epoxidiol-to-Inorganic Sulfate Aerosol Ratio Results in Extensive Conversion of Inorganic Sulfate to Organosulfur Forms: Implications for Aerosol Physicochemical Properties, *Environ. Sci. Technol.*, 53, 8682–8694, <https://doi.org/10.1021/acs.est.9b01019>, 2019.

Song M, MacLean AM, Huang Y, Smith NR, Blair SL, et al. 2019.. Liquid-liquid phase separation and viscosity within secondary organic aerosol generated from diesel fuel vapors. . *Atmos. Chem. Phys.* 19:(19):12515–29

N. G. A. Gerrebos, J. Zaks, F. K. A. Gregson, M. Walton-Raaby, H. Meeres, I. Zigg, W. F. Zandberg and A. K. Bertram, High Viscosity and Two Phases Observed over a Range of Relative Humidities in Biomass Burning Organic Aerosol from Canadian Wildfires, *Environ. Sci. Technol.*, 2024, **58**, 21716–21728

For the AFM, can the authors comment how well the AFM represents the morphology airborne aqueous droplets?

We would like to acknowledge that AFM typically characterizes particles after deposition in under-saturated conditions, which may introduce morphological changes when compared with aerosols suspended as aqueous droplets. However, several studies listed below have shown that for aqueous droplets containing dissolved organics, the mixing state and morphology after evaporation can closely resemble that of the original airborne droplet, particularly when deposited onto inert or smooth surfaces like silica wafers. Given the controlled drying conditions and inert silica substrate used, we expect the AFM images to reasonably reflect the mixing state and morphology of the airborne droplets.

#### References:

Madawala, C. K., Lee, H. D., Kaluarachchi, C. P., & Tivanski, A. V. (2023). Quantifying the viscosity of individual submicrometer semisolid particles using atomic force microscopy. *Analytical chemistry*, 95(39), 14566-14572.

Madawala, C. K., Molina, C., Kim, D., Gamage, D. K., Sun, M., Leibensperger III, R. J., ... & Tivanski, A. V. (2024). Effects of wind speed on size-dependent morphology and composition of sea spray aerosols. *ACS earth and space chemistry*, 8(8), 1609-1622.
